1 **Geography and environmental pressure are predictive of class-specific**  
2 **radioresistance in black fungi**

3

4 Lorenzo Aureli<sup>1,2</sup>, Claudia Coleine<sup>1,\*</sup>, Manuel Delgado-Baquerizo<sup>3,4</sup>, Dag Ahren<sup>2,5</sup>, Alessia Cemmi<sup>6</sup>,  
5 Ilaria Di Sarcina<sup>6</sup>, Silvano Onofri<sup>1</sup>, Laura Selbmann<sup>1,7</sup>

6

7 <sup>1</sup> *Department of Ecological and Biological Sciences, University of Tuscia, Viterbo, Italy*

8 <sup>2</sup> *Department of Biology, Lund University, Lund, Sweden*

9 <sup>3</sup> *Unidad Asociada CSIC-UPO (BioFun). Universidad Pablo de Olavide, Sevilla, 41013, Spain.*

10 <sup>4</sup> *Laboratorio de Biodiversidad y Funcionamiento Ecosistémico. Instituto de Recursos Naturales y*  
11 *Agrobiología de Sevilla (IRNAS), CSIC, Sevilla, Spain.*

12 <sup>5</sup> *National Bioinformatics Infrastructure Sweden (NBIS), Department of Biology, Lund University, Lund,*  
13 *Sweden*

14 <sup>6</sup> *Fusion and Technology for Nuclear Safety and Security Department, Italian National Agency for New*  
15 *Technologies, Energy and Sustainable Economic Development (ENEA FSN-FISS-SNI), Rome, Italy*

16 <sup>7</sup> *Italian Antarctic National Museum (MNA), Mycological Section, Genoa, Italy*

17

18 **Correspondence to:** [coleine@unitus.it](mailto:coleine@unitus.it)

## 19 **Originality statement**

20 Although previous studies showed the extraordinary ability of a few strains of black fungi to survive  
21 ionizing radiation, the overall radioresistance of this group of organisms has not been defined yet.  
22 Moreover, how and why radioresistance shifts across environmental gradients remain virtually  
23 unknown. Here, we collected black fungi from locations across the globe and found that biogeography  
24 shapes the responses of black fungi to environmental stress with UV light being significantly  
25 correlated with radiotolerance. Our study provides a clear picture of the boundaries of life for black  
26 fungi under ionizing radiation; further, we demonstrate, for the first time, that this ability in such  
27 microorganisms, not only is related to taxonomy, but also may be a consequence of their adaptation  
28 to various factors encountered in the environment where they live.

29

## 30 **Abstract**

31 Black fungi are among the most resistant organisms to ionizing radiation on Earth. However, our  
32 current knowledge is based on studies on a few isolates, while the overall radioresistance limits across  
33 this microbial group and the relationship with local environmental conditions remains largely  
34 undetermined. To address this knowledge gap, we assessed the survival of 101 strains of black fungi  
35 isolated across a worldwide spatial distribution to gamma radiation doses up to 100 kGy. We found  
36 that intra and inter-specific taxonomy, UV radiation and precipitation levels primarily influence the  
37 radioresistance in black fungi. Altogether, this study provides insights into the adaptive mechanisms  
38 of black fungi to extreme environments and highlights the role of local adaptation in shaping the  
39 survival capabilities of these extreme-tolerant organisms.

40

41 **Keywords:** Ionizing radiation, black fungi, survival, extremophiles, astrobiology, environmental  
42 pressure

43

44

45

46

47

## 48 Introduction

49 Radiation is one of the most dangerous hazards for life, among which gamma rays (i.e. high energy  
50 photons having wavelengths less than 0.1 nm) represent a serious challenge for survival and integrity  
51 of any life-forms (Dartnell, 2011). They may induce dramatic damage in biomolecules and cellular  
52 structures by direct ionization or causing radiolysis of water and, consequently, oxidative stress  
53 (Azzam et al., 2012). On Earth, there are three principal sources of gamma rays: (i) the natural  
54 radioactive nuclides, mainly  $^{40}\text{K}$  and the radionuclides from the  $^{232}\text{Th}$  and  $^{238}\text{U}$  series (Ichimiya et al.,  
55 1998; Walencik-Łata, 2022); (ii) the cosmic rays colliding with the nuclei in the atmosphere (Share  
56 et al., 2001; Wissmann et al. 2005); and (iii) human activities as in radioactive wastes, nuclear test  
57 and nuclear accident sites (Yamamoto et al., 2008; Hu et al., 2010). Albeit radioactive environments  
58 are limited only to restricted sites on our planet (Khan et al., 2020; Mousseau et al., 2020), ionizing  
59 radiation is one of the major damaging factors encountered beyond Earth (Evans et al., 2003; Dartnell  
60 et al., 2007; Roth et al., 2021); indeed, high gamma rays backgrounds are ubiquitous in interplanetary  
61 space and on the surface of most of the planetary bodies.

62 Among terrestrial life-forms, a small number of microorganisms have been reported to survive  
63 gamma radiation levels significantly higher than the background in the environments where they live  
64 (Gabani et al., 2013; Kwang-Woo Jung et al., 2017; Coleine et al. 2022; Coleine & Delgado-  
65 Baquerizo, 2022). Black meristematic fungi (thereafter black fungi) form an ascomycetous  
66 polyphyletic group spanning two classes (*Dothideomycetes* and *Eurotiomycetes*, mainly represented  
67 by the orders *Capnodiales* and *Chaetothyriales*, respectively) (Selbmann et al., 2020). Despite being  
68 phylogenetically distant, they share morphological characteristics as convergent adaptation to the  
69 extreme conditions where they live (Selbmann et al., 2005; Eisenman et al., 2012; Tesei, 2022). These  
70 fungi are among the most extreme-tolerant organisms on our planet, encompassing a stunning ability  
71 to survive and even flourish under prohibitive conditions, including radiation (Gorbushina et al. 2018;  
72 Selbmann et al., 2018; Coleine et al., 2022). Indeed, it has been recently reported an extraordinary  
73 resistance of these fungi to both acute and chronic exposure to a plethora of terrestrial and space  
74 relevant radiation (e.g. UV-B, X-rays, gamma rays, and cosmic rays) (Selbmann et al., 2011; Pacelli  
75 et al., 2018, 2020; Shuryak et al., 2019a; Aureli et al., 2020; Schultzhaus et al., 2020; Malo et al.,  
76 2021). These microorganisms have been investigated as possible biological means for radioprotection  
77 in contaminated environments and in manned space missions (Cordero et al., 2017; Aversch et al.,  
78 2022). Additionally, the study of radioresistant microorganisms is of astrobiological significance to  
79 unveil the survival and persistence capacity of life in highly irradiated extraterrestrial environments  
80 (Dartnell, 2011, Moissl-Eichinger et al., 2016; Horne et al., 2022).

81 Despite these advances, a vast bulk of questions still remains unanswered. In particular, there are  
82 three major sources of uncertainties that have precluded scientists to untangle how and why black  
83 fungi manage to resist ionizing radiation. First, most efforts have focused on a few strains (i.e.  
84 *Cryomyces*, *Friedmanniomyces* and *Exophiala* spp.) only, while a comprehensive study exploring  
85 the potential diverse radioresistance abilities among phylogenetically and ecologically distinct  
86 members, including those colonizing both natural and polluted anthropized niches, is still lacking.  
87 Second, most isolates come from a narrow range of environmental conditions and from local regions,  
88 while a more comprehensive study on black fungi across broader spatial distribution is lacking.  
89 Finally, very little is known on how environmental stressors, including the solar radiation levels of

90 the regions from which these taxa are isolated, explain the actual levels of radioresistance in  
91 individual taxa.

92 Here, we tested the resistance of 101 black fungal strains to acute exposure to gamma radiation to  
93 relate these responses to the environmental conditions. The specimens were selected from  
94 *Dothideomycetes* and *Eurotiomycetes* classes and had a worldwide spatial distribution to cover the  
95 broadest range of different ecologies, life-styles, and geography (e.g. from Antarctica to temperate  
96 regions and from anthropic impacted to polluted sites). We aimed to: i) define the radioresistance  
97 limits of the broadest selection of black fungi tested so far; ii) identify new possible model organisms  
98 for radioprotection and astrobiology studies; iii) evaluate the potential differences in radioresistance  
99 between *Dothideomycetes* and *Eurotiomycetes*. Indeed, the first are mainly isolated from extreme dry  
100 and cold natural environments, whereas the latter show a remarkable ability to colonize hot and  
101 polluted anthropized environments (Selbmann et al., 2005; Isola et al., 2021; Tesei, 2022); iv) identify  
102 the main environmental parameters driving radioresistance in these fungi. Altogether, this  
103 information will provide new insights into the ability of black fungi to cope with high doses of  
104 ionizing radiation, paving the way for further genomic and metabolic investigations and provide a  
105 fundamental contribution to define the habitability of terrestrial environments contributing for  
106 speculations on a potential terrestrial-like life in the Solar System and beyond.

107

108

## 109 **Materials and Methods**

### 110 *Strains selection*

111 For the study, 101 strains of black meristematic fungi were selected from the Culture Collection of  
112 Fungi from Extreme Environments (CCFEE) and National Antarctic Museum Culture Collection of  
113 Fungi from Extreme Environments (MNA-CCFEE), Mycological Section of the Italian National  
114 Museum of Antarctica. The strains belong to 20 species of the order *Capnodiales* (class  
115 *Dothideomycetes*) and 7 species of the order *Chaetothyriales* (*Eurotiomycetes*) (Table S1). The strain  
116 selection was performed to study phylogenetically distinct members of meristematic black fungi and  
117 to cover a range of different environmental conditions (Table S2).

118

### 119 *Exposure conditions*

120 Fungal colonies of the selected strains were incubated in triplicate on Malt Extract Agar (MEA)  
121 medium in Petri dishes according to the temperatures recorded in the localities from which the strains  
122 were isolated and the optimum growth temperature and growth rate recorded in representative strains  
123 of the tested species in previous laboratory tests: 15 °C for 3 months for *Dothideomycetes* and 25 °C  
124 for 1 week for *Eurotiomycetes* (Selbmann et al., 2005; Egidi et al., 2014). After the growth, the  
125 colonies were retrieved from each replicate and separately desiccated under laminar flow in a sterile  
126 cabinet. Dried colonies from each triplicate were exposed to gamma radiation under ambient  
127 conditions using a <sup>60</sup>Co source at the Gamma Irradiation CALLIOPE Facility (ENEA Casaccia  
128 Research Centre, Rome) (Baccaro et al., 2019). The irradiation was performed at doses of 0.1, 0.5, 1,  
129 2, 3, 5, 15, 30, 50, and 100 kGy through different exposure times at a dose rate of 1.12 kGy(air)/h.

130 To obtain control samples, colonies from each desiccated replicate were not exposed to gamma  
131 radiation but maintained under the same environmental conditions as the irradiated samples.

132

### 133 *Survival assessment*

134 The survival of microorganisms after exposure to each gamma radiation dose was measured using  
135 the colony-forming unit (CFU) test. Three colonies from each replicate exposed to gamma radiation  
136 were separately rehydrated in NaCl 0.9% solution for 72 h at 25 °C and 15 °C for *Eurotiomyces*  
137 and *Dothideomyces*, respectively. After rehydration, 0.1 mL of each cellular suspension at a  
138 concentration of 15,000 CFU/mL was plated in triplicate on MEA medium in Petri dishes. The dishes  
139 inoculated with *Eurotiomyces* strains were incubated for 1 week at 25 °C, whereas dishes with  
140 *Dothideomyces* strains for 3 months at 15 °C. The survival of microorganisms at each dose was  
141 expressed as the ratio between the mean of colonies scored in the exposed replicates and the mean of  
142 colonies scored in non-exposed samples. The decimal reduction dose (D10) value, defined as the  
143 absorbed radiation dose required to inactivate 90% of the microbial population, was estimated for  
144 each strain from its survival curve. To calculate D10 values, the best curves describing the survival  
145 of each strain were determined by fitting the exponential function ( $y = \exp^{-bx}$ ) to the observed data  
146 through the Python SciPy package V.1.9.0. The curve fits were evaluated through the  $\chi^2$  test by using  
147 the Python code.

148

### 149 *Intraspecific differences in radioresistance*

150 Among the selected species, *Exophiala xenobiotica*, *Recurvomyces mirabilis*, *Meristemomyces*  
151 *frigidus*, *Elasticomyces elasticus*, *Extremus antarcticus*, *Friedmanniomyces endolithicus*, and  
152 *Cryomyces antarcticus* species were represented by more than one strain. To quantify the  
153 radioresistance variability in species including more than one strain, the coefficient of variation (CV)  
154 was calculated through the Python SciPy package. The one-way ANOVA post hoc Tukey HSD test  
155 and t-test were performed through Python bioinfokit package V.2.1.0. to assess the difference in D10  
156 values between strains of *E. elasticus*, *M. frigidus*, *R. mirabilis* and *F. endolithicus* collected from  
157 distinct localities and among the mean D10 values calculated in the resistance groups.

158

### 159 *Environmental metadata acquisition*

160 The ecological bases of the resistance to ionizing radiation was investigated by considering 27  
161 environmental parameters obtained from the localities where the strains were isolated: Annual Mean  
162 Temperature (AMT); Mean Temperature of the Warmest Quarter (MTWAQ); Mean Temperature of  
163 the Coldest Quarter (MTCQ); Annual Precipitation (AP); Precipitation of the Wettest Month  
164 (PWEM); Precipitation of the Driest Month (PDM); Precipitation Seasonality (Coefficient of  
165 Variation) (PS); Precipitation of the Wettest Quarter (PWEQ); Precipitation of the Driest Quarter  
166 (PDQ); Precipitation of the Warmest Quarter (PWAQ); Precipitation of the Coldest Quarter (PCQ);  
167 Mean Diurnal Range (Mean of monthly (maximum temperature - minimum temperature)) (MDR);  
168 Temperature Seasonality (standard deviation  $\times 100$ ) (TS); Maximum Temperature of the Warmest  
169 Month (MTWAM); Minimum Temperature of Coldest Month (MTCM); Temperature Annual Range

170 (calculated as MTWAM - MTCM) (TAR); Mean Temperature of the Wettest Quarter (MTWEQ);  
171 Mean Temperature of the Driest Quarter (MTDQ); Isothermality (calculated as MDR/TAR) ( $\times 100$ )  
172 (IT); solar radiation; UV index; biome type (biome); isolation source; country of isolation (country);  
173 Köppen-Geiger climate classification subgroup (KG climate); class to which the strains belong  
174 (Class); the coordinates of the localities where the samples were collected. The environmental data  
175 were available for 86 of the 101 strains tested in the study, related to 36 different localities  
176 (Supplementary Table 2, Fig. 2).

177

### 178 *Identification of the most important environmental parameters and statistical analyses*

179 To identify the environmental parameters that are linked to the radioresistance of the strains, a  
180 classification predictive model was constructed through the eXtreme Gradient Boosting (XGBoost)  
181 ensemble tree-based learning algorithm. The algorithm was implemented using the Python XGBoost  
182 package V.1.6.2. Categorical data (biome, isolation source, country, KG climate, Class) were  
183 converted through ordinal encoding pre-processing. Similarly, the D10 values were grouped into 9  
184 categories and transformed into an ordinal variable. We then estimated the importance of each  
185 environmental parameter by evaluating the mean decrease in the model score when the values of the  
186 parameter were randomly shuffled in 1000 repeats through the permutation feature importance  
187 approach by using the Python ELI5 package V.0.13.0. The XGBoost model and the permutation were  
188 first performed considering all the strains with environmental data available. Successively, the  
189 analyses on subgroups consisting of *Dothideomycetes* and *Eurotiomycetes* were performed to identify  
190 predictors of radioresistance in strains from the two classes. Finally, the 24 strains of *F. endolithicus*  
191 were considered in relation with environmental data to identify parameters that may influence  
192 intraspecific differences in radioresistance. The *F. endolithicus* species was selected due to the  
193 availability of environmental data observed in 9 distinct localities where the strains were collected.  
194 Along with *F. endolithicus*, *C. antarcticus*, *E. elasticus* and *E. xenobiotica* were the most represented  
195 species (8, 10 and 30 strains, respectively). However, the lack of environmental data related to part  
196 of *C. antarcticus* and *E. elasticus* strains did not allow the construction of a model, whereas most of  
197 *E. xenobiotica* strains were isolated from the same locality.

198 To examine the differences in mean decreases in the model score obtained for each environmental  
199 variable, we performed the one-way ANOVA post hoc Tukey HSD test through the Python bioinfokit  
200 package V.2.1.0. Spearman's rank correlation coefficient and p-value were calculated through the  
201 Python SciPy package V.1.9.0.

202

## 203 **Results**

### 204 *Survival of fungal strains after gamma radiation exposure*

205 The ability to generate colonies after gamma radiation exposure revealed a non-linear effect of  
206 radiation on black fungi cell survival, which was highly dependent on taxonomy. Indeed, three  
207 distinct responses can be observed from the dose-survival curves of *Eurotiomycetes* and  
208 *Dothideomycetes* strains, despite all exhibiting a similar trend that can be described by the exponential  
209 curve  $y = \exp^{-bx}$  (Fig. S1-S3). Specifically, in all *Eurotiomycetes*, a threshold in cell survival was

210 reported between 0.1 and 0.5 kGy, with the survival fraction reaching values below 50%. However,  
211 a drastic change in the slopes occurred beyond 0.5 kGy, thus determining a slower decrease in cell  
212 survival until reaching the maximum resistance doses of each strain (Fig. 3).

213 On the other hand, two different general responses to gamma radiation were shown among  
214 *Dothideomycetes* strains. The first observed response was displayed by 33 strains. Although the  
215 slopes of the curves among these strains were highly variable, they all showed a drop in cell survival  
216 from the dose of 0.5 kGy followed by a slower decrease while approaching the maximum doses of  
217 resistance. Instead, the remaining 37 strains, that included exclusively the totality of  
218 *Friedmanniomyces* and *Cryomyces* strains, showed a general drop in the cell survival between 3 and  
219 15 kGy, followed by a slight decline in survival fraction (Fig. 3).

220 The D10 values obtained from the survival curves ranged from 0.30 (*Eurotiomyces* sp.  
221 CCFEE6388) to 23.5 kGy (*C. minteri* MNA-CCFEE5187) (Table S1). Although marked differences  
222 were observed in the survival among the studied strains, colonies from most samples were able to  
223 grow after exposure at doses higher than 0.1 kGy. Furthermore, except for *E. xenobiotica*  
224 CCFEE5985, all strains formed colonies at doses higher than 1 kGy, with overall higher survival  
225 fractions observed in the *Dothideomycetes* strains (Fig. 4).

226 In *Eurotiomyces*, the mean D10 was  $0.8 \pm 0.3$  kGy with a CV 0.45. The values of the group were  
227 distributed between 0.3 and 1.4 kGy (Fig. 4), shown by *Eurotiomyces* sp. CCFEE6388,  
228 *Chaetothyriales* sp. CCFEE6169, and *E. xenobiotica* CCFEE6180, respectively (Table S1).  
229 Moreover, only the strains *E. xenobiotica* CCFEE5819, CCFEE6180, CCFEE6182, CCFEE6196 and

230 CCFEE6237 showed D10 above 1 kGy. The maximum resistance dose of 3 kGy was recorded for the  
231 strain *E. xenobiotica* CCFEE5877, whereas 21 out of 31 strains showed the ability to grow at the  
232 maximum dose of 1 kGy (Table S1).

233 In contrast, high variability in radioresistance was observed among *Dothideomycetes*, whose values  
234 ranged between 0.4 and 23.5 kGy, observed in *M. frigidus* CCFEE5401 and *C. minteri* MNA-  
235 CCFEE5187, respectively (Fig. 4). The D10 values showed a discontinuous distribution that defined  
236 two groups of radioresistance in *Dothideomycetes*. The first group was represented by strains  
237 exhibiting D10 below 4 kGy (mean D10, mean  $1.5 \pm$  SD 0.7 kGy), whose values partially overlapped  
238 the values found in *Eurotiomyces*. However, all the strains of the group survived at doses of 2 kGy  
239 or higher, with 12 strains reaching the maximum survival dose at 5 kGy. This group consisted of all  
240 tested species of *Dothideomycetes*, with the exception of species belonging to *Cryomyces* and  
241 *Friedmanniomyces* genera. The D10 values of the second group ranged between 13.4 and 23.5 kGy,  
242 making these strains the most resistant among the tested black fungi (mean D10  $17.6 \pm$  2.9 kGy, CV  
243 0.15). Furthermore, all the strains of the second group formed colonies at a dose of 15 kGy or higher,  
244 with 10 strains reaching the maximum survival dose at 50 kGy (Supplementary Table S1).

245

246 *Relation between radioresistance and environmental parameters, taxonomy and*  
247 *geographical distribution*

248 We further investigate the correlation between environmental and spatial conditions with the capacity  
249 of black fungi to withstand radiation. To investigate the ecological bases of the radioresistance in  
250 black fungi, we considered the importance of geography and a set of crucial environmental parameters

251 occurring in the localities from which the strains were isolated in predicting the D10 values. The  
252 permutation feature importance scores obtained from the models indicated the spatial distribution (i.e.  
253 the longitude and the distance from the equator) of the localities as the major predictors of the  
254 radioresistance while considering the strains altogether and *Dothideomyces* separately, although the  
255 relative importance of the two variable varies between them. Among the environmental variables, the  
256 main predictors of the radioresistance considering both the strains altogether and *Dothideomyces*  
257 only were those related to the solar radiation exposure (i.e. UV index and solar radiation) and  
258 precipitation (i.e. precipitation in the driest month (PDQ) and precipitation seasonality (PS)) (Fig. 5a,  
259 b).

260 Unlike *Dothideomyces*, strains of *Eurotiomyces* were collected from both environments directly  
261 exposed to natural factors (e.g. surfaces of monuments) and anthropogenic and polluted environments  
262 (i.e. fuel tanks). When considering only strains exposed to natural environmental factors, parameters  
263 linked to temperature (the annual mean temperature (AMT) and the mean temperature of coldest  
264 quarter (MTCQ)) and the distance from the equator were the most important variables, whereas the  
265 solar radiation exposure and precipitation levels were shown not to play a pivotal role in  
266 radioresistance prediction for this class (Fig. 5c).

267

#### 268 *Intraspecific differences in radioresistance and their correlation to environmental factors*

269 In our study, 7 fungal species are represented by more than one strain (Table S1). Among them, the  
270 highest intraspecies variation in the survival data was observed in the *E. elasticus* and *M. frigidus*  
271 strains (CV 0.5 and 0.6, respectively), whereas *F. endolithicus* strains had a relatively lower CV (i.e.  
272 0.1). In *E. elasticus*, we observed a significantly higher radioresistance (D10 above 2 kGy) in strains  
273 isolated from Antarctica compared to those isolated from temperate regions (D10 below 1 kGy) (Fig.  
274 6a). Similar responses were observed among the strains of *M. frigidus*, whose strains from  
275 Argentinian Andes were observed to be significantly more resistant than the strains from Italy, with  
276 a difference in D10 of about 1 kGy among the two groups (Fig. 6b). These data indicated that  
277 geography and the local environmental conditions may influence the level of radioresistance in these  
278 fungi.

279 *F. endolithicus* species was represented by 27 strains isolated from 11 different localities in Antarctica  
280 (Fig. 1, Table S1). The analysis showed the geography, the precipitation parameters (AP and PDQ),  
281 the UV index, the temperature (AMT and MTCQ) as the major predictors of the radioresistance in *F.*  
282 *endolithicus* strains (Fig. 6c). The relationship between AP, PDQ and UV index and the radioresistance  
283 was confirmed by the Spearman's correlation (Fig. 6d).

284

## 285 **Discussion**

286 Major unknown persist about how and why different black fungi taxonomies withstand radiation  
287 across large environmental gradients worldwide. Here, the ability of 101 *Dothideomyces* and  
288 *Eurotiomyces* black fungi to form colonies after acute exposure to gamma radiation was assessed  
289 to define the radioresistance limits of the broadest range of these extreme-tolerant guilds tested so far.  
290 Moreover, we correlate this radioresistance with environmental and spatial conditions supporting



291 black fungi across global environmental gradients. We showed that taxonomy is a critical component  
292 when explaining the capacity of black fungi to resist radiation. Moreover, environmental conditions  
293 were critical in explaining the variation in blackfungi radioresistance with UV light being an  
294 important predictor. These results suggest that blackfungi radioresistance levels are in consistency  
295 with the environment surrounding these organisms.

296  
297 The amplitude of radioresistance capacity varied considerably among black fungi in our wide  
298 selection; many of them were able to form colonies after gamma radiation exposure doses from 0.5  
299 to 5 kGy. Yet, some others were still viable when exposed at the extraordinary value of 50 kGy. D10  
300 also varied considerably among strains tested, ranging from 0 kGy up to above 23 kGy, and the  
301 species falling into two distinct categories. In this study, we found a general higher aptitude to cope  
302 with ionizing radiation in dothideomycetous black fungi; in fact, the capacity to grow after lethal dose  
303 exposition over 5 kGy was an exclusive prerogative of few *Dothideomycetes*, indicating a class-  
304 tendency throughout this ability. In addition, the highest radioresistance observed (up to 50 kGy) was  
305 displayed specifically by black fungal *Dothideomycetes*, which have been isolated in the driest and  
306 coldest desert on Earth only: the ice-free areas in continental Antarctica, including the the martian  
307 analogue McMurdo Dry Valleys. Based on this evidence, we investigated in deeper detail the origin  
308 of this difference studying the effect of various environmental factors in shaping radioresistance  
309 tendency in black fungi, taking into consideration that dothideomycetous do prefer highly stressing  
310 cold-dry natural environments, while eurotiomycetous spread preferentially in hot or anthropic  
311 impacted or polluted environments.

312 Our study showed that biogeography, sun exposure, and the levels of precipitation were the major  
313 predictors of D10 in strains exposed to natural parameters, indicating that the ability to cope with  
314 ionizing radiation may be related to the adaptation to other environmental stressors (Shuryak et al.,  
315 2019a). Indeed, factors encountered in the extreme environments such as UV exposure, drought, and  
316 low and high temperatures can also cause oxidative stress, requiring the activation of cellular  
317 mechanisms similar to those that mediate the responses to ionizing radiation (Leprince et al., 2010;  
318 Lushchak, 2011; Kostadinova et al., 2012; Braga et al., 2015; Mejía-Barajas et al., 2017; Gostinčar  
319 et al., 2018). The burden of skills for the success in such environments, therefore, may represent a  
320 pre-adaptation for radioresistance in these fungi (Etemadifar et al., 2016; Sharma et al., 2017; Lim et  
321 al., 2019; Coleine et al., 2022). In fact, although exhibiting overall high radioresistance, none of the  
322 strains tested in our study were isolated from radioactive environments; either, the environmental  
323 background radiation should not have represented an evolutionary driver for this ability.  
324 In our study, the adaptation of black fungi to a broad range of different habitats may explain the large  
325 diversity that we observed in their radioresistance. In addition to interspecific fluctuation in  
326 radioresistance, the distinct localities may have driven the intraspecific variability in different species  
327 by inducing the local adaptation to various environmental factors (Ellison et al., 2011; Gladieux et  
328 al., 2014; Branco, 2019). Consistently with this hypothesis, the highest intraspecific variability  
329 observed was exhibited by strains of *E. elasticus* and *M. frigidus*, whose distribution spans different  
330 continents, which was highly correlated to increasing environmental pressure; indeed, the most  
331 resistant strains were found in Antarctica and Argentinian Andes, respectively.

332

333 The importance of environmental factors for radioresistance was also confirmed by our results on the  
334 Antarctic endemic species *F. endolithicus* strains, living in the driest, coldest highly solar and UV  
335 radiation impacted environment and here resulted the far most radioresistant guild, together with  
336 *Cryomyces* strains living in the same desert (i.e. Antarctica). The relation occurring between the  
337 radioresistance and the adaptation to other environmental stressors may be mediated by both  
338 morphological and physiological properties of the fungal cells. Previous studies have indicated  
339 morphological characteristics of black fungi as possible determinants against environmental stressors  
340 (Kogej et al., 2006). Furthermore, the melanized cell wall was shown to play a key role in mediating  
341 the resistance of pigmented fungi to ionizing radiation (Dadachova et al., 2008; Shuryak et al., 2014).  
342 Recent advances showed various possible trends, represented by both linear and non-linear threshold  
343 correlations (Pacelli et al., 2018b; Schultzhaus et al., 2020). In our study, all the tested strains showed  
344 a non-linear exponential relationship between the gamma rays doses and the survival fraction,  
345 suggesting that radioresistance may be mediated by additional physiological and molecular processes  
346 differentially expressed in distinct species of black fungi (Robertson et al., 2012; Sharma et al., 2017;  
347 Romsdahl et al., 2020; Kreusch et al., 2021; Das et al., 2022; Kanekar & Kanekar, 2022). This may  
348 indicate how the response of microorganisms to ionizing radiation depends not only on the tested  
349 organisms, but also on the exposure conditions. In this perspective, future studies focusing on the  
350 genetic and molecular mechanisms mediating the radioresistance in black fungi should be performed.  
351 Our study confirms black fungi as excellent models for the study of the mechanisms used by  
352 eukaryotic cells to cope with ionizing radiation (Selbmann et al., 2018). We observed a general  
353 stunning radioresistance of most of the black fungi if compared to other microorganisms and some of  
354 them exceed the survival limits of the most radioresistant prokaryotic and eukaryotic forms of life  
355 (e.g. Cox et al., 2005; Daly, 2009; Sukhi et al., 2009; Singh et al., 2013; Krisko, 2013; Shuryak,  
356 2019b). However, it should be highlighted that the response to ionizing radiation in microorganisms  
357 can vary markedly with the cellular state and exposure conditions (Hafer et al., 2010; Schultzhaus et  
358 al., 2020; Couceiro et al., 2021). Considering the dose rates recorded in the most radioactive  
359 environments on Earth, our results show how part of black fungi may hypothetically survive there  
360 even after thousands of years exposure to ionizing radiation in a silent desiccated state (Kashparov et  
361 al., 2018; Matsuo et al., 2019). Similarly, the radiation levels recorded in the interplanetary space and  
362 on the surface of celestial bodies that could host forms of life, such as Mars, are remarkably lower  
363 than those tested in our experiment (Zeitlin et al., 2013; Hassler et al., 2014; Inozemtsev et al., 2015).

364 Taken together, by simultaneously testing a broad set of ecologically and phylogenetically distinct  
365 fungal strains, the present study supplies the first characterization of the radioresistance in black  
366 fungi. Along with ecological information on the strains, these results allowed us to display how the  
367 radioresistance in black fungi may be the result of their adaptation to various environmental variables.  
368 From an evolutionary perspective, our findings demonstrate how the pressure exerted by a few  
369 stressors may induce mechanisms that enable the microorganisms to cope with a broader range of  
370 possible damaging factors. In the overall, this work may give new insights into the prediction of  
371 evolutionary responses to extreme environments and into the ability of life to adapt and persist in  
372 harsh terrestrial and extraterrestrial environments (e.g. Mars). This information represents the  
373 baseline for untangling the genomic and metabolomic traits underlying the radioresistance of black  
374 fungi, which may pave the way to untangle the limits of life in extreme radioactive environments.

## 376 **Acknowledgments**

377 This research was financially supported by the Italian Space Agency (ASI), Life in Space – ASI N.  
378 2019-3-U.0, and BioSigN MicroFossils – ASI N. 2018-6-U.0. We thank the Italian National Program  
379 of Antarctic Research (PNRA) and the Italian National Antarctic Museum “Felice Ippolito” (MNA)  
380 are acknowledged for funding the collection of Antarctic samples MNA-CCFEE and CCFEE. M.D-  
381 B. acknowledges support from the Spanish Ministry of Science and Innovation for the I+D+i project  
382 PID2020-115813RA-I00 funded by MCIN/AEI/10.13039/501100011033. M.D-B. is also supported  
383 by a project of the Fondo Europeo de Desarrollo Regional (FEDER) and the Consejería de  
384 Transformación Económica, Industria, Conocimiento y Universidades of the Junta de Andalucía  
385 (FEDER Andalucía 2014-2020 Objetivo temático “01 - Refuerzo de la investigación, el desarrollo  
386 tecnológico y la innovación”) associated with the research project P20\_00879 (ANDABIOMA).

387

## 388 **Authors contributions**

389 L.A., C.C., and L.S., designed the study and interpreted the results; L.A. performed molecular and  
390 statistical analysis and led the writing; all authors revised the manuscript and approved the final  
391 version.

392

## 393 **Data availability statement**

394 All data generated or analyzed during this study are included in this published article and its  
395 supplementary information files.

396

## 397 **Conflict of interest**

398 The authors declare no competing financial interests.

399

## 400 **References**

401 Aureli, L., Pacelli, C., Cassaro, A., Fujimori, A., Moeller, R., and Onofri, S. (2020) Iron ion particle  
402 radiation resistance of dried colonies of *Cryomyces antarcticus* embedded in Martian regolith  
403 analogues. *Life* 10: 306.

404 Averagesch, N.J., Shunk, G.K., and Kern, C. (2022) Cultivation of the Dematiaceous Fungus  
405 *Cladosporium sphaerospermum* Aboard the International Space Station and Effects of Ionizing  
406 Radiation. *Frontiers in microbiology* 13:.

407 Azzam, E.I., Jay-Gerin, J.-P., and Pain, D. (2012) Ionizing radiation-induced metabolic oxidative  
408 stress and prolonged cell injury. *Cancer letters* 327: 48–60.

409 Bazzicalupo, A. (2022) Local adaptation in fungi. *FEMS Microbiology Reviews* 46: fuac026.

- 410 Braga, G.U., Rangel, D.E., Fernandes, E.K., Flint, S.D., and Roberts, D.W. (2015) Molecular and  
411 physiological effects of environmental UV radiation on fungal conidia. *Current genetics* 61: 405–  
412 425.
- 413 Branco, S. (2019) Fungal diversity from communities to genes. *Fungal Biology Reviews* 33: 225–  
414 237.
- 415 Bryan, R., Jiang, Z., Friedman, M., and Dadachova, E. (2011) The effects of gamma radiation, UV  
416 and visible light on ATP levels in yeast cells depend on cellular melanization. *Fungal biology* 115:  
417 945–949.
- 418 Coleine, C. and Delgado-Baquerizo, M. (2022) Unearthing terrestrial extreme microbiomes for  
419 searching terrestrial-like life in the Solar System. *Trends in Microbiology*.
- 420 Coleine, C., Stajich, J.E., and Selbmann, L. (2022) Fungi are key players in extreme ecosystems.  
421 *Trends in Ecology & Evolution*.
- 422 Cordero, R.J., Vij, R., and Casadevall, A. (2017) Microbial melanins for radioprotection and  
423 bioremediation. *Microbial Biotechnology* 10: 1186.
- 424 Couceiro, J. da C., Faretto, M.B., Demétrio, C.G.B., Meyling, N.V., and Delalibera Jr, Í. (2021)  
425 UV-B Radiation Tolerance and Temperature-Dependent Activity Within the Entomopathogenic  
426 Fungal Genus *Metarhizium* in Brazil. *Frontiers in Fungal Biology* 2: 645737.
- 427 Cox, M.M. and Battista, J.R. (2005) *Deinococcus radiodurans*—the consummate survivor. *Nature*  
428 *Reviews Microbiology* 3: 882–892.
- 429 Dadachova, E., Bryan, R.A., Howell, R.C., Schweitzer, A.D., Aisen, P., Nosanchuk, J.D., and  
430 Casadevall, A. (2008) The radioprotective properties of fungal melanin are a function of its chemical  
431 composition, stable radical presence and spatial arrangement. *Pigment cell & melanoma research* 21:  
432 192–199.
- 433 Dadachova, E. and Casadevall, A. (2008) Ionizing radiation: how fungi cope, adapt, and exploit with  
434 the help of melanin. *Current opinion in microbiology* 11: 525–531.
- 435 Daly, M.J. (2009) A new perspective on radiation resistance based on *Deinococcus radiodurans*.  
436 *Nature Reviews Microbiology* 7: 237–245.
- 437 Dartnell, L.R. (2011) Ionizing radiation and life. *Astrobiology* 11: 551–582.
- 438 Dartnell, L.R., Desorgher, L., Ward, J.M., and Coates, A. (2007) Martian sub-surface ionising  
439 radiation: biosignatures and geology. *Biogeosciences* 4: 545–558.
- 440 Das, T., Al-Tawaha, A.R., Pandey, D.K., Nongdam, P., Shekhawat, M.S., Dey, A., et al. (2022)  
441 Halophilic, Acidophilic, Alkaliphilic, Metallophilic, and Radioresistant Fungi: Habitats and Their  
442 Living Strategies. In *Extremophilic Fungi*. Springer, pp. 171–193.
- 443 Egidi, E., De Hoog, G., Isola, D., Onofri, S., Quaedvlieg, W., De Vries, M., et al. (2014) Phylogeny  
444 and taxonomy of meristematic rock-inhabiting black fungi in the Dothideomycetes based on multi-  
445 locus phylogenies. *Fungal Diversity* 65: 127–165.

- 446 Eisenman, H.C. and Casadevall, A. (2012) Synthesis and assembly of fungal melanin. *Applied*  
447 *microbiology and biotechnology* 93: 931–940.
- 448 Ellison, C.E., Hall, C., Kowbel, D., Welch, J., Brem, R.B., Glass, N., and Taylor, J.W. (2011)  
449 Population genomics and local adaptation in wild isolates of a model microbial eukaryote.  
450 *Proceedings of the National Academy of Sciences* 108: 2831–2836.
- 451 Etemadifar, Z., Gholami, M., and Derikvand, P. (2016) UV-resistant bacteria with multiple-stress  
452 tolerance isolated from desert areas in Iran. *Geomicrobiology journal* 33: 1–7.
- 453 Evans, L.G., Boynton, W.V., Reedy, R.C., Starr, R.D., and Trombka, J.I. (2003) Background lines in  
454 the Mars Odyssey 2001 gamma-ray detector. *SPIE*, pp. 31–44.
- 455 Ferrara, G., Di Sarcina, I., Cemmi, A., and Baccaro, S. (2019) Gamma irradiation Calliope facility at  
456 ENEA-Casaccia Research Centre (Rome, Italy).
- 457 Fox-Powell, M.G., Hallsworth, J.E., Cousins, C.R., and Cockell, C.S. (2016) Ionic strength is a barrier  
458 to the habitability of Mars. *Astrobiology* 16: 427–442.
- 459 França, M.B., Panek, A.D., and Eleutherio, E. (2007) Oxidative stress and its effects during  
460 dehydration. *Comparative Biochemistry and Physiology Part A: Molecular & Integrative Physiology*  
461 146: 621–631.
- 462 Gabani, P. and Singh, O.V. (2013) Radiation-resistant extremophiles and their potential in  
463 biotechnology and therapeutics. *Applied microbiology and biotechnology* 97: 993–1004.
- 464 Gladieux, P., Ropars, J., Badouin, H., Branca, A., Aguilera, G., De Vienne, D.M., et al. (2014) Fungal  
465 evolutionary genomics provides insight into the mechanisms of adaptive divergence in eukaryotes.  
466 *Molecular ecology* 23: 753–773.
- 467 Goordial, J., Davila, A., Lacelle, D., Pollard, W., Marinova, M.M., Greer, C.W., et al. (2016) Nearing  
468 the cold-arid limits of microbial life in permafrost of an upper dry valley, Antarctica. *The ISME*  
469 *journal* 10: 1613–1624.
- 470 Gostinčar, C. and Gunde-Cimerman, N. (2018) Overview of oxidative stress response genes in  
471 selected halophilic fungi. *Genes* 9: 143.
- 472 Hafer, K., Rivina, L., and Schiestl, R.H. (2010) Cell cycle dependence of ionizing radiation-induced  
473 DNA deletions and antioxidant radioprotection in *Saccharomyces cerevisiae*. *Radiation research* 173:  
474 802–808.
- 475 Hassler, D.M., Zeitlin, C., Wimmer-Schweingruber, R.F., Ehresmann, B., Rafkin, S., Eigenbrode,  
476 J.L., et al. (2014) Mars' surface radiation environment measured with the Mars Science Laboratory's  
477 Curiosity rover. *science* 343: 1244797.
- 478 Horne, W.H., Volpe, R.P., Korza, G., DePratti, S., Conze, I.H., Shuryak, I., et al. (2022) Effects of  
479 Desiccation and Freezing on Microbial Ionizing Radiation Survivability: Considerations for Mars  
480 Sample Return. *Astrobiology* 22: 1337–1350.
- 481 Hu, Q.-H., Weng, J.-Q., and Wang, J.-S. (2010) Sources of anthropogenic radionuclides in the  
482 environment: a review. *Journal of environmental radioactivity* 101: 426–437.

- 483 Ichimiya, T., Narita, T., and Kitao, K. (1998) Natural background gamma-ray spectrum. List of  
484 gamma-rays ordered in energy from natural radionuclides.
- 485 Inozemtsev, K., Kushin, V., Tolochev, R., and Shurshakov, V. (2015) Measurement of space  
486 radiation doses and linear energy transfer spectra inside biological satellite BION-M1.  
487 *Aviakosmicheskaja i Ekologicheskaja Meditsina= Aerospace and Environmental Medicine* 49: 16–  
488 22.
- 489 Isola, D., Scano, A., Orrù, G., Prenafeta-Boldú, F.X., and Zucconi, L. (2021) Hydrocarbon-  
490 contaminated sites: Is there something more than *Exophiala xenobiotica*? New insights into black  
491 fungal diversity using the long cold incubation method. *Journal of Fungi* 7: 817.
- 492 Jung, K.-W., Lim, S., and Bahn, Y.-S. (2017) Microbial radiation-resistance mechanisms. *Journal of*  
493 *Microbiology* 55: 499–507.
- 494 Kanekar, P.P. and Kanekar, S.P. (2022) Radiophilic, Radioresistant, and Radiotolerant  
495 Microorganisms. In *Diversity and Biotechnology of Extremophilic Microorganisms from India*.  
496 Springer, pp. 251–267.
- 497 Kashparov, V., Levchuk, S., Zhurba, M., Protsak, V., Khomutinin, Y., Beresford, N.A., and Chaplow,  
498 J.S. (2018) Spatial datasets of radionuclide contamination in the Ukrainian Chernobyl Exclusion  
499 Zone. *Earth System Science Data* 10: 339–353.
- 500 Khan, I., Qin, Z., Xie, T., Bin, Z., Li, H., Sun, W., and Lewis, E. (2020) Evaluation of health hazards  
501 from radionuclides in soil and rocks of North Waziristan, Pakistan. *International Journal of Radiation*  
502 *Research* 18: 243–253.
- 503 Kogej, T., Gorbushina, A.A., and Gunde-Cimerman, N. (2006) Hypersaline conditions induce  
504 changes in cell-wall melanization and colony structure in a halophilic and a xerophilic black yeast  
505 species of the genus *Trimmatostroma*. *Mycological research* 110: 713–724.
- 506 Kostadinova, N., Krumova, E., Stefanova, T., Dishliyska, V., and Angelova, M. (2012) Transient  
507 cold shock induces oxidative stress events in Antarctic fungi. *Oxidative Stress Book* 1: 75–99.
- 508 Kreusch, M.G. and Duarte, R.T.D. (2021) Photoprotective compounds and radioresistance in  
509 pigmented and non-pigmented yeasts. *Applied Microbiology and Biotechnology* 105: 3521–3532.
- 510 Krisko, A. and Radman, M. (2013) Biology of extreme radiation resistance: the way of *Deinococcus*  
511 *radiodurans*. *Cold Spring Harbor perspectives in biology* 5: a012765.
- 512 Leprince, O. and Buitink, J. (2010) Desiccation tolerance: from genomics to the field. *Plant Science*  
513 179: 554–564.
- 514 Lim, S., Jung, J.-H., Blanchard, L., and de Groot, A. (2019) Conservation and diversity of radiation  
515 and oxidative stress resistance mechanisms in *Deinococcus* species. *FEMS microbiology reviews* 43:  
516 19–52.
- 517 Lushchak, V.I. (2011) Adaptive response to oxidative stress: Bacteria, fungi, plants and animals.  
518 *Comparative Biochemistry and Physiology Part C: Toxicology & Pharmacology* 153: 175–190.

- 519 Malo, M.E., Schultzhause, Z., Frank, C., Romsdahl, J., Wang, Z., and Dadachova, E. (2021)  
520 Transcriptomic and genomic changes associated with radioadaptation in *Exophiala dermatitidis*.  
521 *Computational and Structural Biotechnology Journal* 19: 196–205.
- 522 Matsuo, M., Taira, Y., Orita, M., Yamada, Y., Ide, J., Yamashita, S., and Takamura, N. (2019)  
523 Evaluation of environmental contamination and estimated radiation exposure dose rates among  
524 residents immediately after returning home to Tomioka Town, Fukushima Prefecture. *International*  
525 *Journal of Environmental Research and Public Health* 16: 1481.
- 526 Mejía-Barajas, J.A., Montoya-Pérez, R., Salgado-Garciglia, R., Aguilera-Aguirre, L., Cortés-Rojo,  
527 C., Mejía-Zepeda, R., et al. (2017) Oxidative stress and antioxidant response in a thermotolerant  
528 yeast. *Brazilian journal of microbiology* 48: 326–332.
- 529 Moissl-Eichinger, C., Cockell, C., and Rettberg, P. (2016) Venturing into new realms?  
530 Microorganisms in space. *FEMS microbiology reviews* 40: 722–737.
- 531 Mousseau, T.A. and Møller, A.P. (2020) Plants in the light of ionizing radiation: what have we learned  
532 from Chernobyl, Fukushima, and other “hot” places? *Frontiers in Plant Science* 11: 552.
- 533 Pacelli, C., Bryan, R.A., Onofri, S., Selbmann, L., Shuryak, I., and Dadachova, E. (2017) Melanin is  
534 effective in protecting fast and slow growing fungi from various types of ionizing radiation.  
535 *Environmental microbiology* 19: 1612–1624.
- 536 Pacelli, C., Bryan, R.A., Onofri, S., Selbmann, L., Zucconi, L., Shuryak, I., and Dadachova, E.  
537 (2018a) Survival and redox activity of *Friedmanniomyces endolithicus*, an Antarctic endemic black  
538 meristematic fungus, after gamma rays exposure. *Fungal biology* 122: 1222–1227.
- 539 Pacelli, C., Bryan, R.A., Onofri, S., Selbmann, L., Zucconi, L., Shuryak, I., and Dadachova, E.  
540 (2018b) The effect of protracted X-ray exposure on cell survival and metabolic activity of fast and  
541 slow growing fungi capable of melanogenesis. *Environmental microbiology reports* 10: 255–263.
- 542 Pacelli, C., Cassaro, A., Aureli, L., Moeller, R., Fujimori, A., and Onofri, S. (2020) The responses of  
543 the black fungus *Cryomyces antarcticus* to high doses of accelerated helium ions radiation within  
544 martian regolith simulants and their relevance for Mars. *Life* 10: 130.
- 545 Robertson, K.L., Mostaghim, A., Cuomo, C.A., Soto, C.M., Lebedev, N., Bailey, R.F., and Wang, Z.  
546 (2012) Adaptation of the black yeast *Wangiella dermatitidis* to ionizing radiation: molecular and  
547 cellular mechanisms. *PloS one* 7: e48674.
- 548 Romsdahl, J., Schultzhause, Z., Chen, A., Liu, J., Ewing, A., Hervey, J., and Wang, Z. (2021) Adaptive  
549 evolution of a melanized fungus reveals robust augmentation of radiation resistance by abrogating  
550 non-homologous end-joining. *Environmental Microbiology* 23: 3627–3645.
- 551 Roth, M.A., Krumholz, M.R., Crocker, R.M., and Celli, S. (2021) The diffuse  $\gamma$ -ray background is  
552 dominated by star-forming galaxies. *Nature* 597: 341–344.
- 553 Scheibe, R. and Beck, E. (2011) Drought, desiccation, and oxidative stress. In *Plant desiccation*  
554 *tolerance*. Springer, pp. 209–231.

- 555 Schultzhause, Z., Romsdahl, J., Chen, A., Tschirhart, T., Kim, S., Leary, D., and Wang, Z. (2020a)  
556 The response of the melanized yeast *Exophiala dermatitidis* to gamma radiation exposure.  
557 *Environmental microbiology* 22: 1310–1326.
- 558 Schultzhause, Z., Romsdahl, J., Chen, A., Tschirhart, T., Kim, S., Leary, D., and Wang, Z. (2020b)  
559 The response of the melanized yeast *Exophiala dermatitidis* to gamma radiation exposure.  
560 *Environmental microbiology* 22: 1310–1326.
- 561 Selbmann, L., Benkő, Z., Coleine, C., De Hoog, S., Donati, C., Druzhinina, I., et al. (2020) Shed light  
562 in the dark lineages of the fungal tree of life—stres. *Life* 10: 362.
- 563 Selbmann, L., De Hoog, G., Mazzaglia, A., Friedmann, E., and Onofri, S. (2005) Fungi at the edge  
564 of life: cryptoendolithic black fungi from Antarctic desert. *Stud Mycol* 51: 1–32.
- 565 Selbmann, L., Isola, D., Zucconi, L., and Onofri, S. (2011) Resistance to UV-B induced DNA damage  
566 in extreme-tolerant cryptoendolithic Antarctic fungi: detection by PCR assays. *Fungal Biology* 115:  
567 937–944.
- 568 Share, G.H. and Murphy, R.J. (2001) Atmospheric gamma rays from solar energetic particles and  
569 cosmic rays penetrating the magnetosphere. *Journal of Geophysical Research: Space Physics* 106:  
570 77–92.
- 571 Sharma, A., Gaidamakova, E.K., Grichenko, O., Matrosova, V.Y., Hoeke, V., Klimenkova, P., et al.  
572 (2017a) Across the tree of life, radiation resistance is governed by antioxidant Mn<sup>2+</sup>, gauged by  
573 paramagnetic resonance. *Proceedings of the National Academy of Sciences* 114: E9253–E9260.
- 574 Sharma, A., Gaidamakova, E.K., Grichenko, O., Matrosova, V.Y., Hoeke, V., Klimenkova, P., et al.  
575 (2017b) Across the tree of life, radiation resistance is governed by antioxidant Mn<sup>2+</sup>, gauged by  
576 paramagnetic resonance. *Proceedings of the National Academy of Sciences* 114: E9253–E9260.
- 577 Shuryak, I. (2019) Review of microbial resistance to chronic ionizing radiation exposure under  
578 environmental conditions. *Journal of environmental radioactivity* 196: 50–63.
- 579 Shuryak, I., Bryan, R.A., Nosanchuk, J.D., and Dadachova, E. (2014) Mathematical modeling  
580 predicts enhanced growth of X-ray irradiated pigmented fungi. *PloS one* 9: e85561.
- 581 Shuryak, I., Tkavc, R., Matrosova, V.Y., Volpe, R.P., Grichenko, O., Klimenkova, P., et al. (2019)  
582 Chronic gamma radiation resistance in fungi correlates with resistance to chromium and elevated  
583 temperatures, but not with resistance to acute irradiation. *Scientific reports* 9: 1–11.
- 584 Singh, H., Kim, H., Song, H., Joe, M., Kim, D., Bahn, Y.-S., et al. (2013) A novel radiation-resistant  
585 strain of *Filobasidium* sp. isolated from the West Sea of Korea. *Journal of microbiology and*  
586 *biotechnology* 23: 1493–1499.
- 587 Sukhi, S.S., Shashidhar, R., Kumar, S.A., and Bandekar, J.R. (2009) Radiation resistance of  
588 *Deinococcus radiodurans* R1 with respect to growth phase. *FEMS microbiology letters* 297: 49–53.
- 589 Tesei, D. (2022) Black fungi research: Out-of-this-world implications. *Encyclopedia* 2: 212–229.



590 Walencik-Łata, A., Szkliniarz, K., Kisiel, J., Polaczek-Grelak, K., Jędrzejczak, K., Kasztelan, M., et  
591 al. (2022) Characteristics of Natural Background Radiation in the GIG Experimental Mine ‘Barbara’,  
592 Poland. *Energies* 15: 685.

593 Wissmann, F., Dangendorf, V., and Schrewe, U. (2005) Radiation exposure at ground level by  
594 secondary cosmic radiation. *Radiation measurements* 39: 95–104.

595 Yamamoto, M., Tomita, J., Sakaguchi, A., Imanaka, T., Fukutani, S., Endo, S., et al. (2008) Spatial  
596 distribution of soil contamination by <sup>137</sup>Cs and <sup>239,240</sup>Pu in the village of Dolon near the  
597 Semipalatinsk Nuclear Test Site: new information on traces of the radioactive plume from the 29  
598 August 1949 nuclear test. *Health physics* 94: 328–337.

599 Zeitlin, C., Hassler, D., Cucinotta, F., Ehresmann, B., Wimmer-Schweingruber, R., Brinza, D., et al.  
600 (2013) Measurements of energetic particle radiation in transit to Mars on the Mars Science  
601 Laboratory. *science* 340: 1080–1084.

602

### 603 **Supporting information captions**

604 **Figure S1.** Survival curves and calculated D10 values in strains of *Eurotomyces*.

605 **Figure S2.** Survival curves and calculated D10 values in strains of lowly resistant *Dothideomyces*

606 **Figure S3.** Survival curves and calculated D10 values in strains of highly resistant *Dothideomyces*.

607 **Supplementary Table S1.** Fungal strains tested in the study and their response to radiation exposure  
608 in terms of D10 and the maximum survival dose.

609 **Supplementary Table S2.** Fungal strains and the localities from where they were collected and the  
610 related environmental metadata. AMT: Annual Mean Temperature; MTWAQ: Mean Temperature of  
611 the Warmest Quarter; MTCQ: Mean Temperature of the Coldest Quarter; AP: Annual Precipitation;  
612 PWEM: Precipitation of the Wettest Month; PDM: Precipitation of the Driest Month; PS:  
613 Precipitation Seasonality (Coefficient of Variation); PWEQ: Precipitation of the Wettest Quarter;  
614 PDQ: Precipitation of the Driest Quarter; PWAQ: Precipitation of the Warmest Quarter; PCQ:  
615 Precipitation of the Coldest Quarter; MDR: Mean Diurnal Range (Mean of monthly (maximum  
616 temperature - minimum temperature)); TS: Temperature Seasonality (standard deviation ×100);  
617 MTWAM: Maximum Temperature of the Warmest Month; MTCM: Minimum Temperature of  
618 Coldest Month; TAR: Temperature Annual Range (calculated as MTWAM - MTCM); MTWEQ:  
619 Mean Temperature of the Wettest Quarter; MTDQ: Mean Temperature of the Driest Quarter; IT:  
620 Isothermality (calculated as MDR/TAR) (×100); biome: biome type; country: country of isolation;  
621 KG climate: Köppen-Geiger climate classification subgroup.

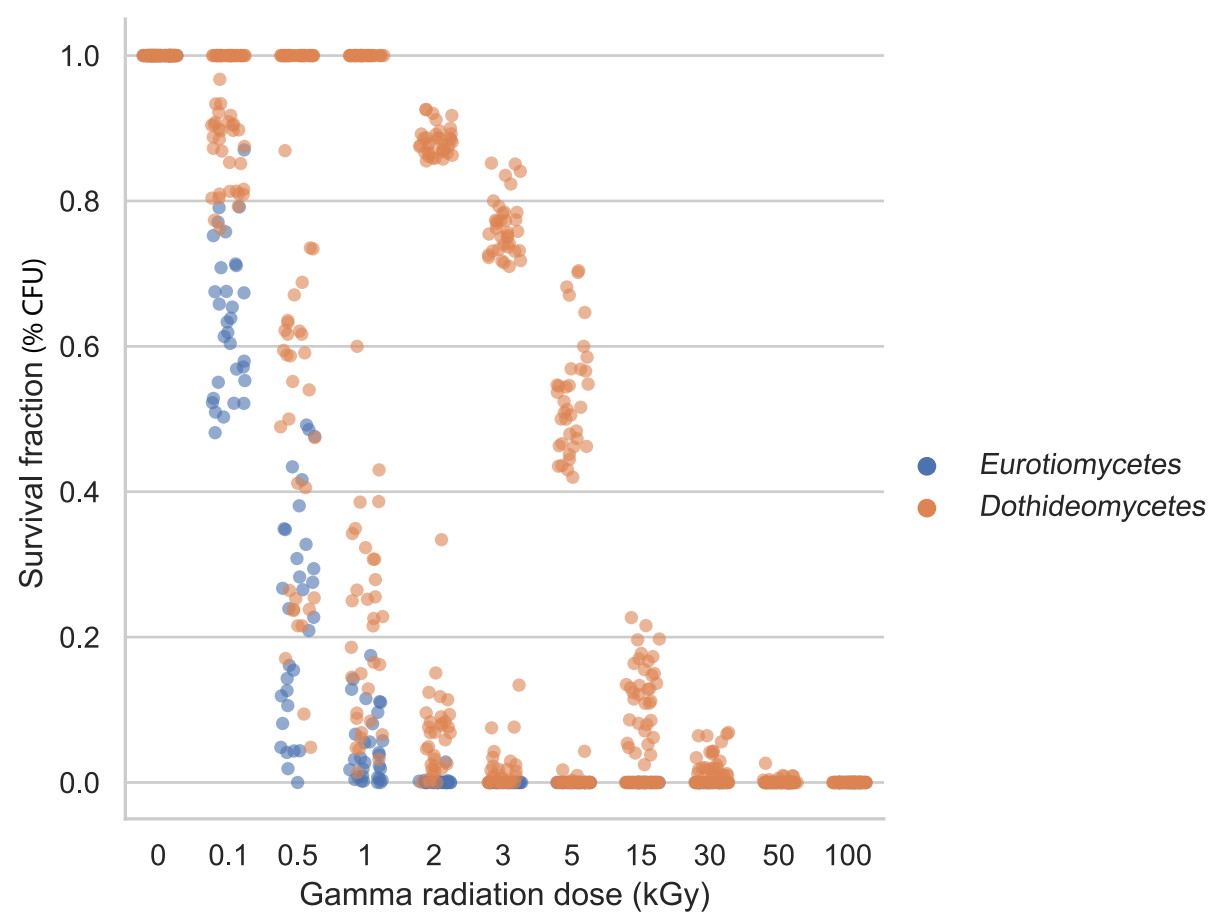

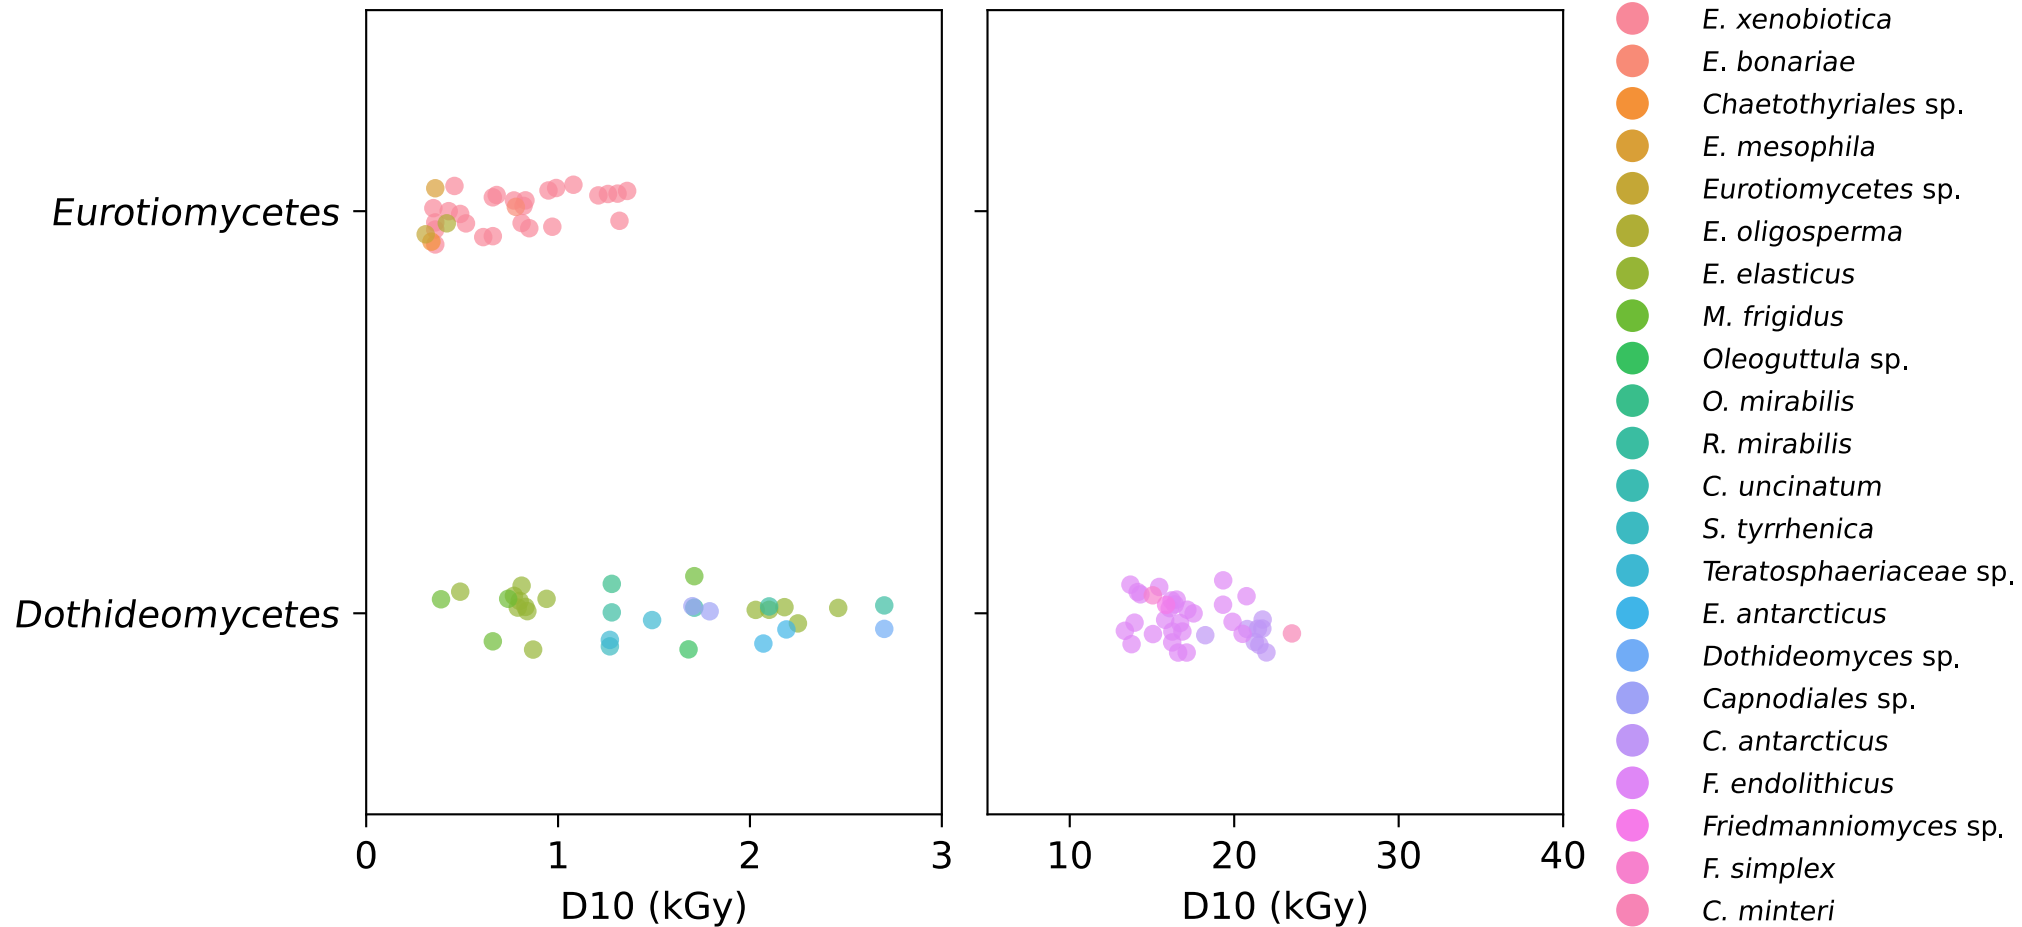

**(a) All strains**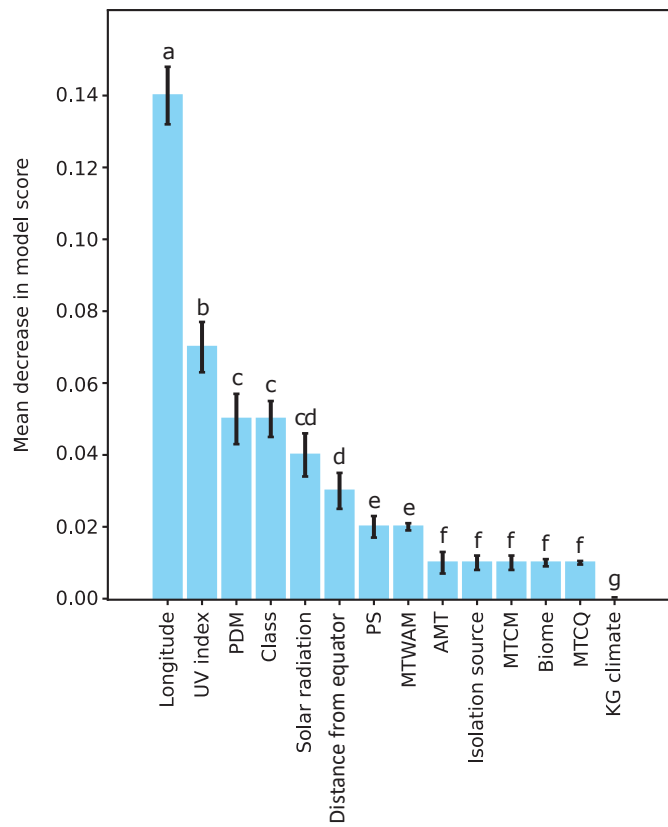**(b) *Dothideomycetes***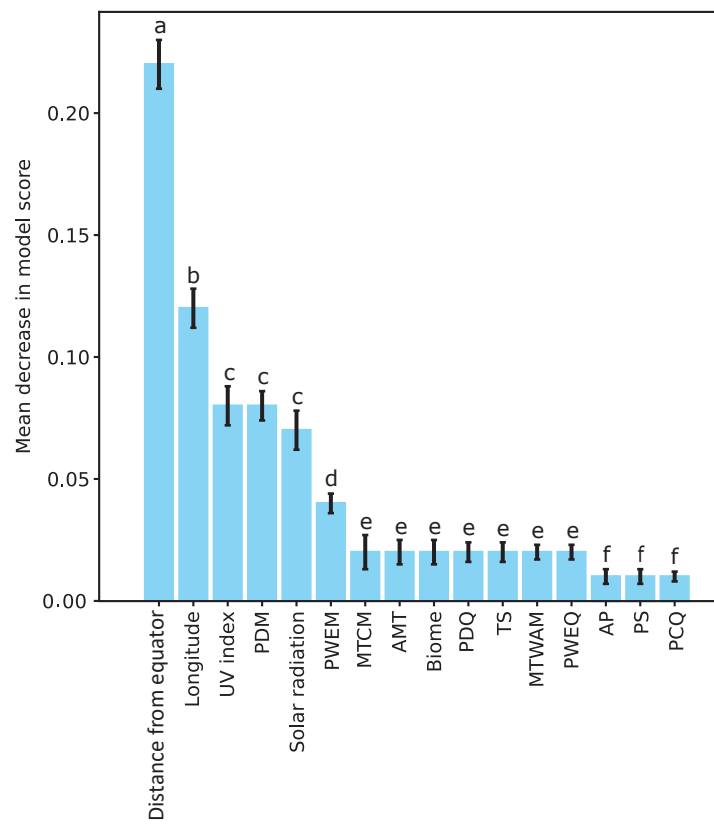**(c) *Eurotiomycetes***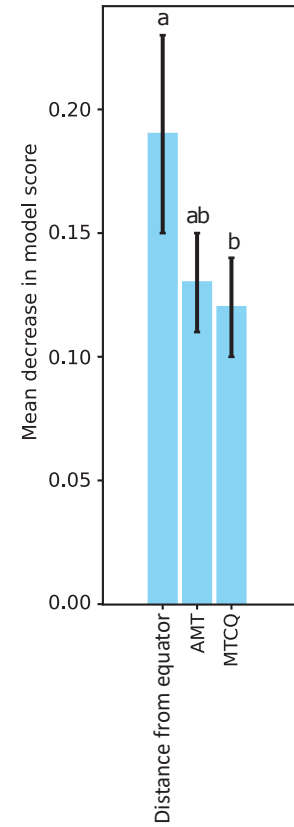

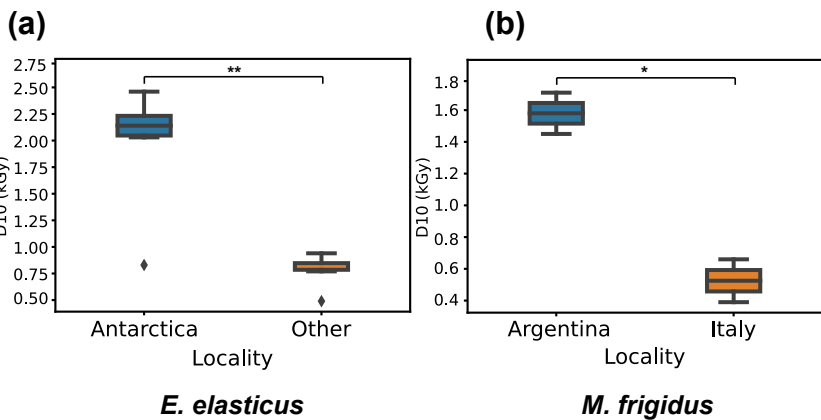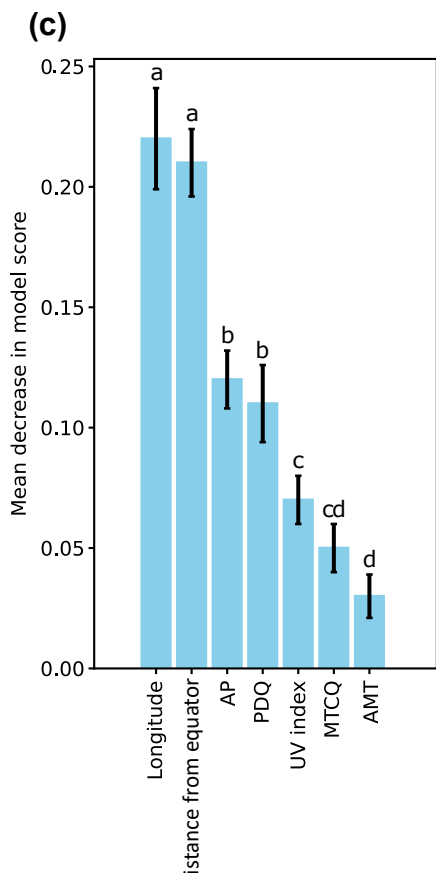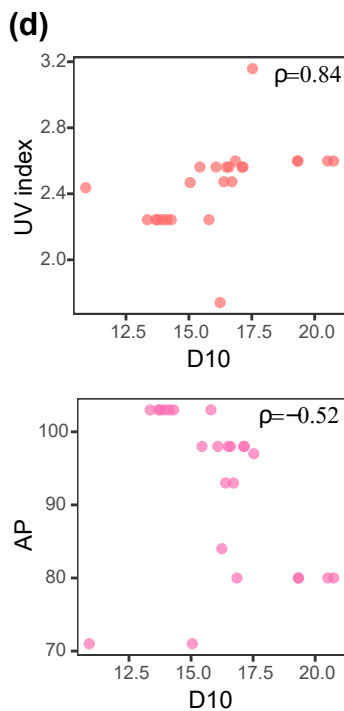

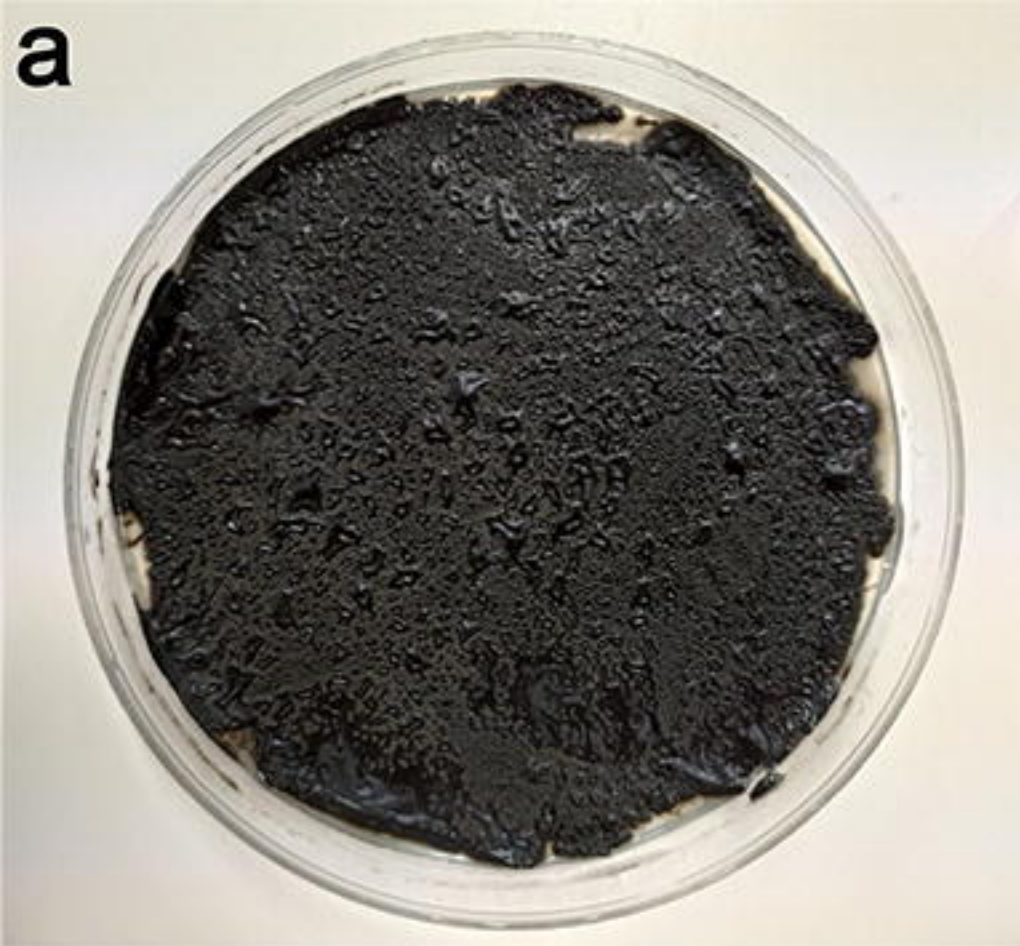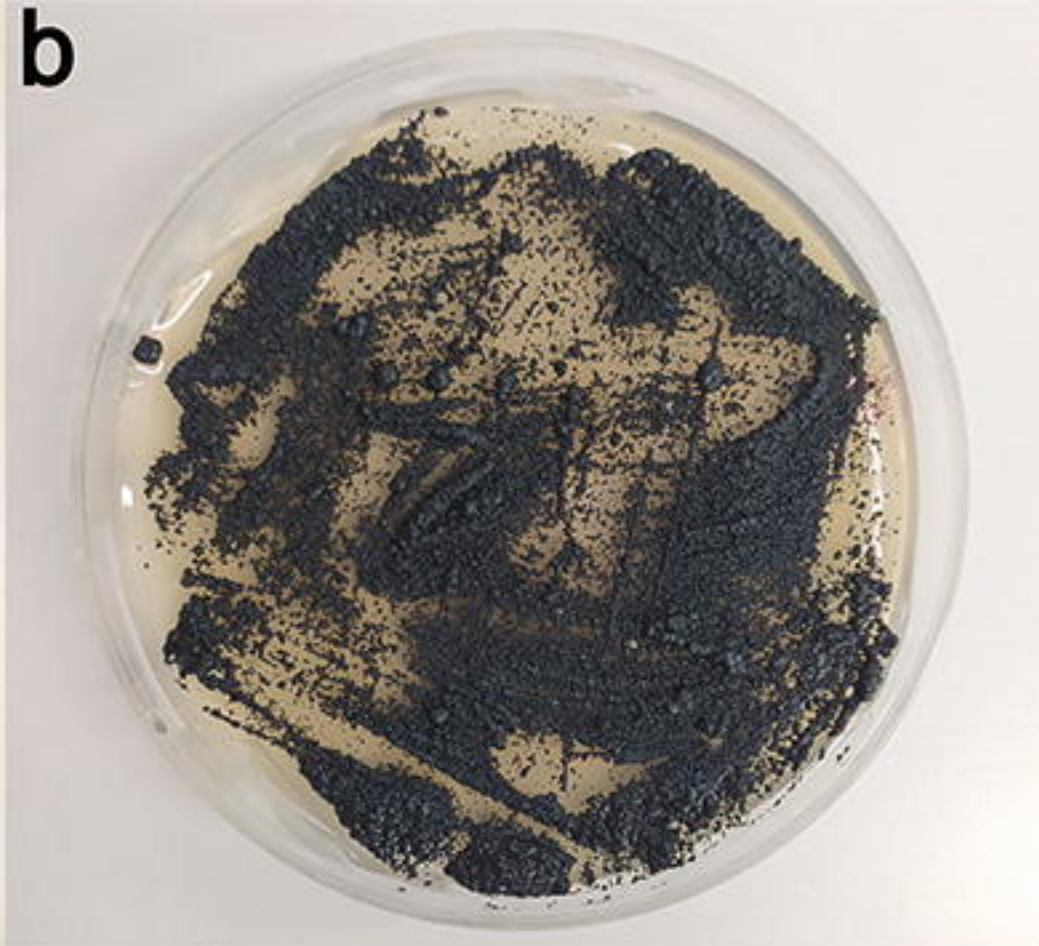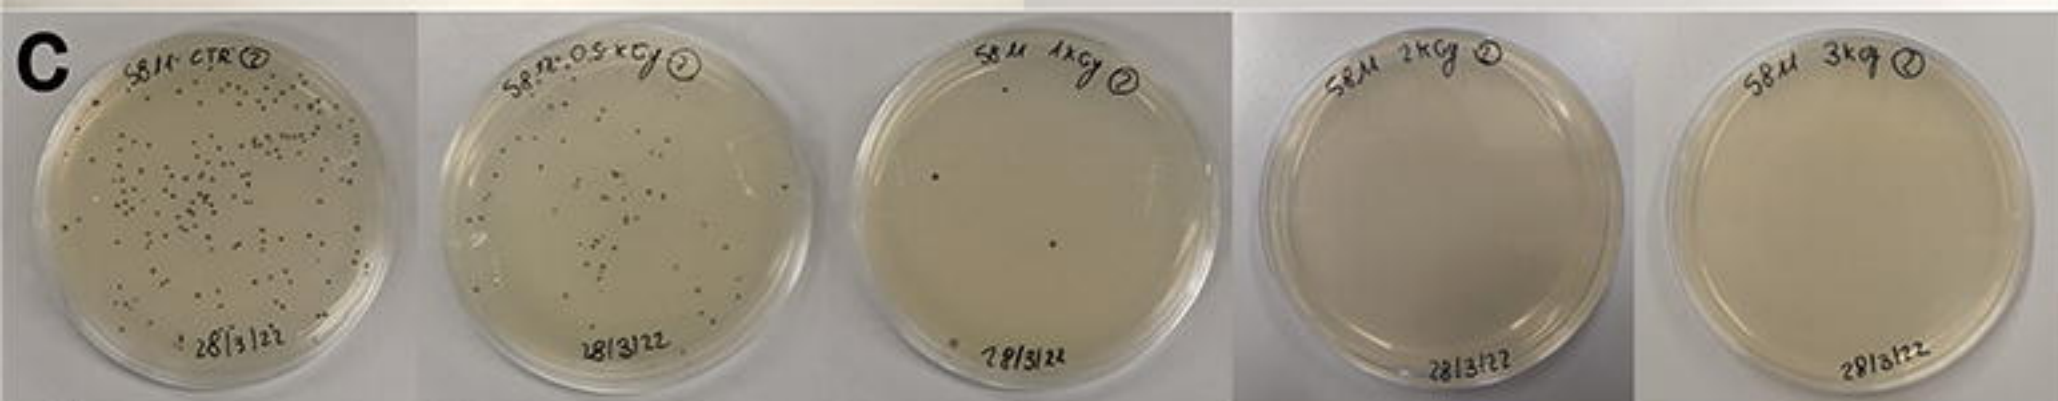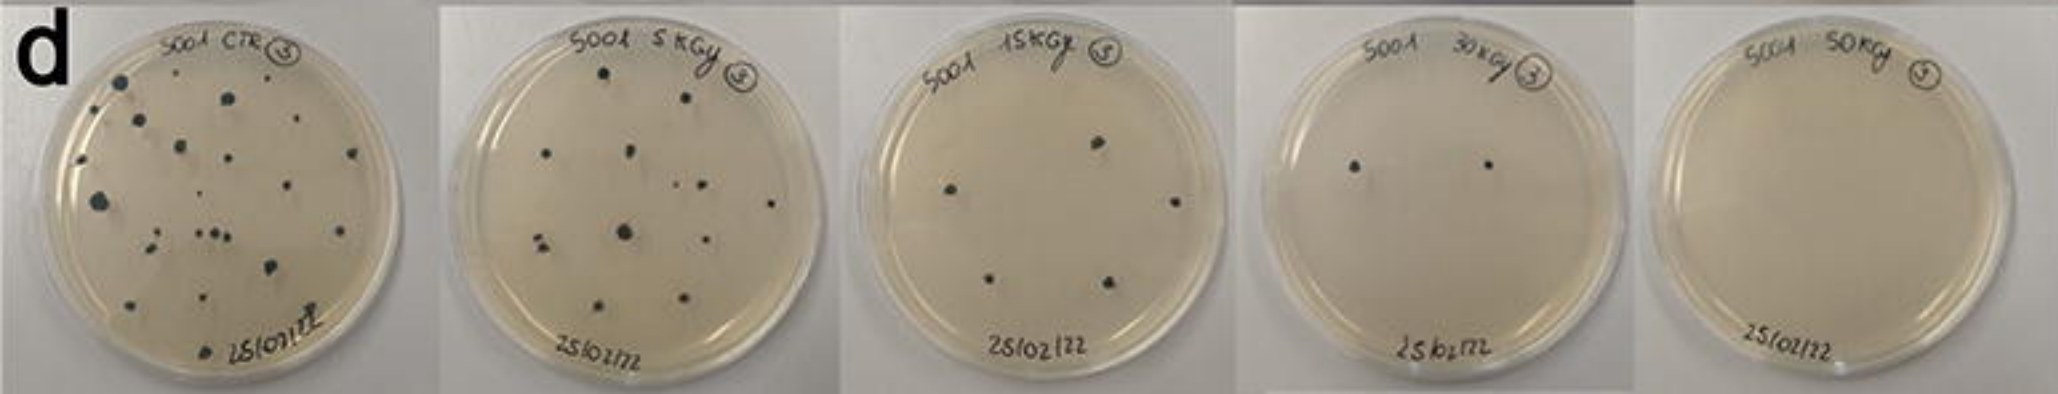

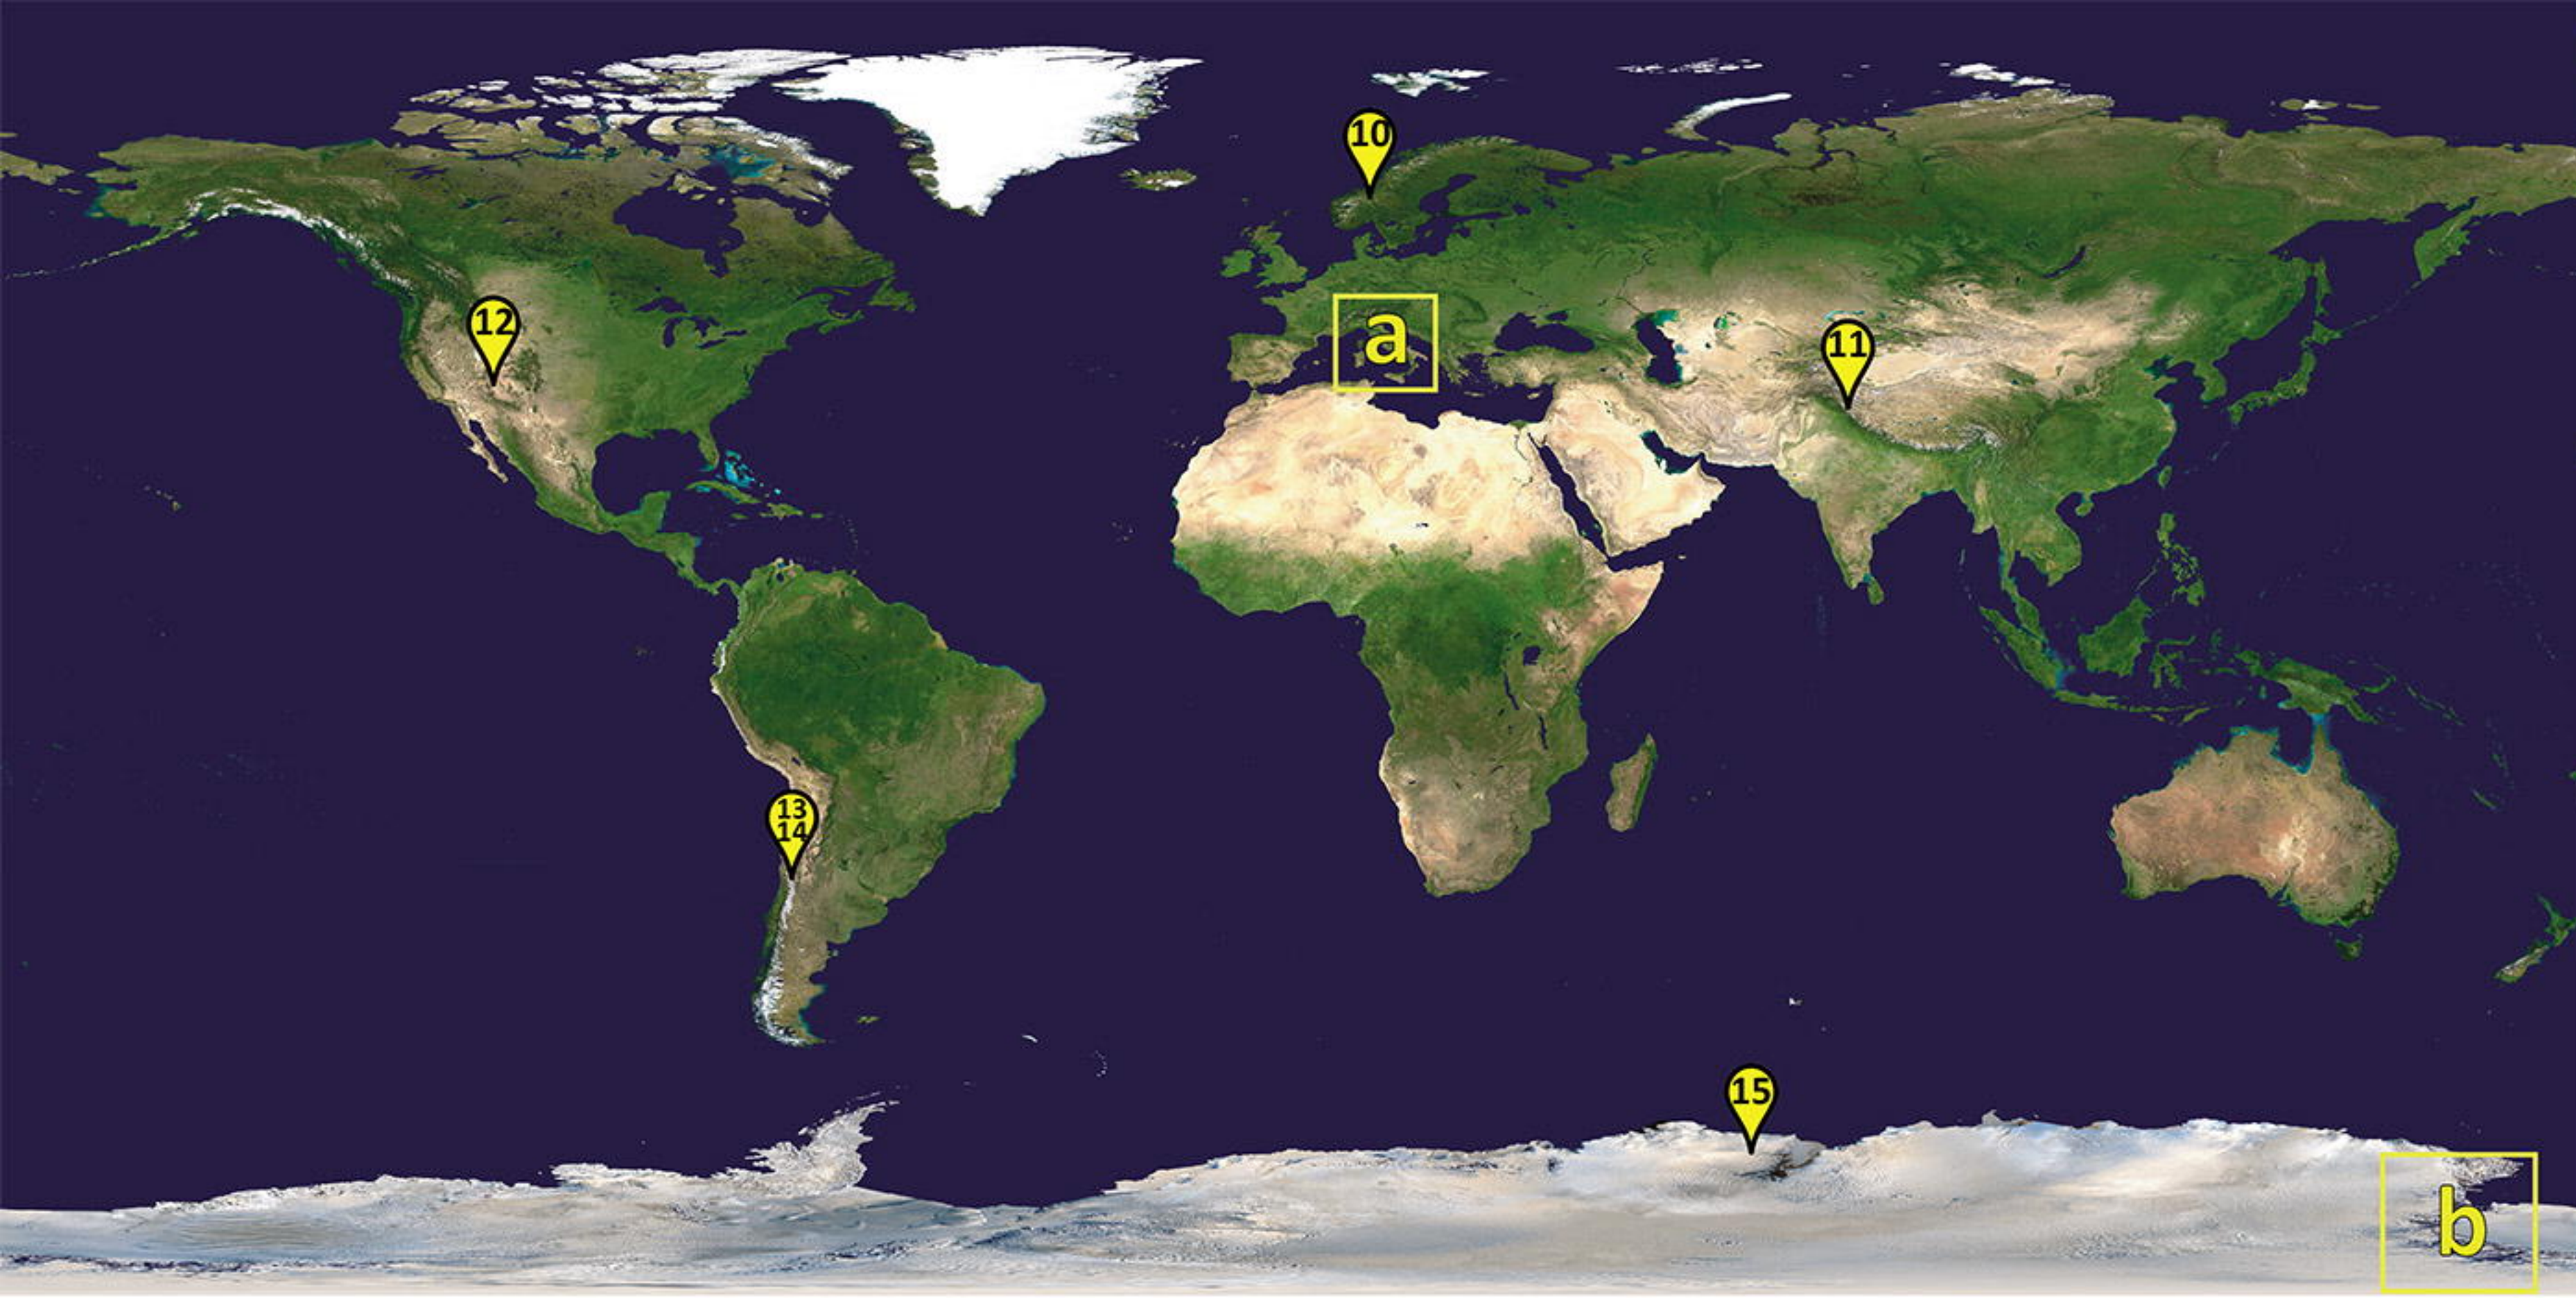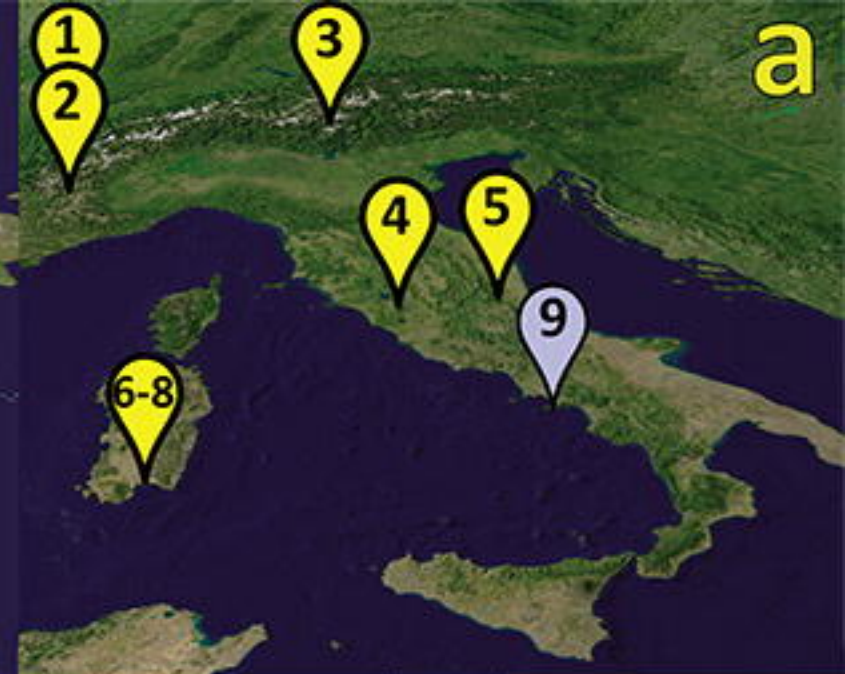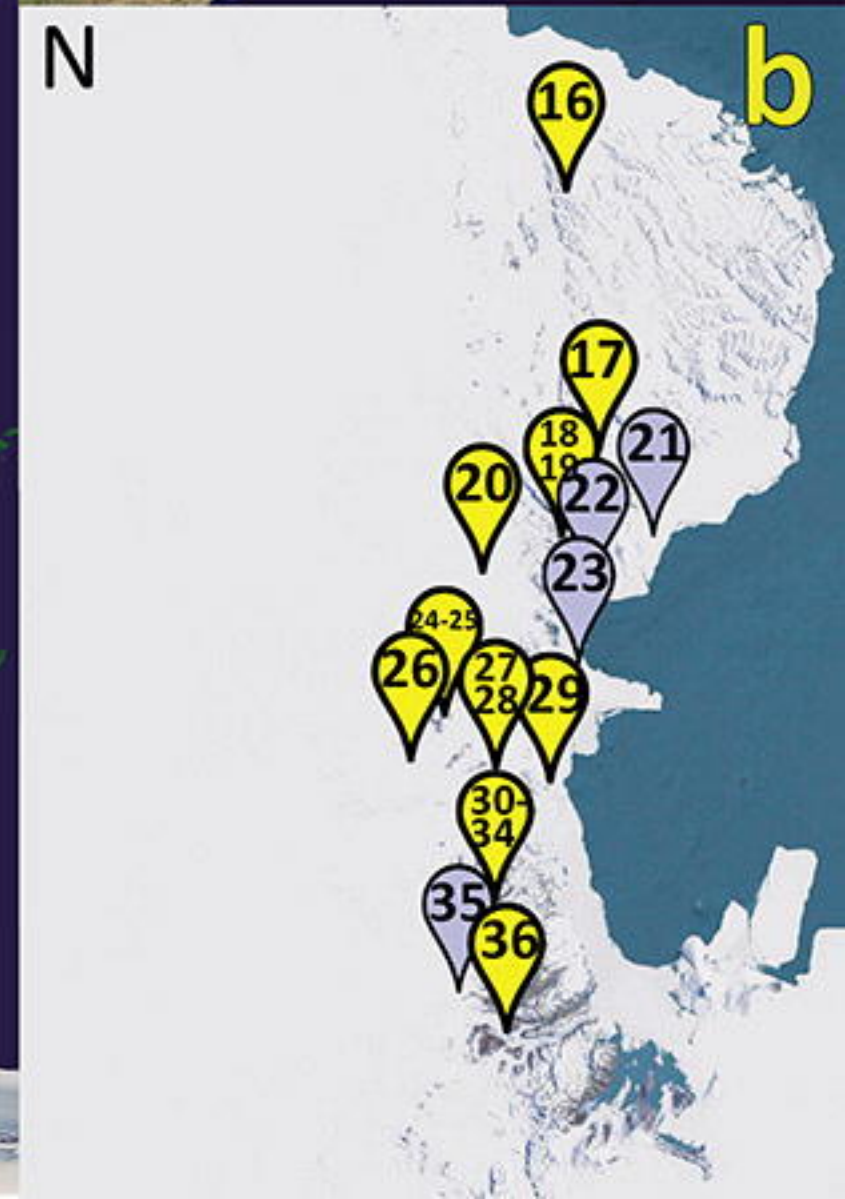

Source: https://www.biorxiv.org/content/10.1101/2023.02.08.527471v1.full.pdf
